# Supplementary material for: Synthesis of high surface area CaxLa(1−x)Al(1−x)MnxO(3−δ) perovskite oxides for oxygen reduction electrocatalysis in alkaline media
Source: Royal Society of Chemistry journal article supplement (doi:10.1039/c6cy01497f), 2016-01-01
Supplement: c6cy01497f1.pdf [file c6cy01497f1.pdf]

## Supplementary Information

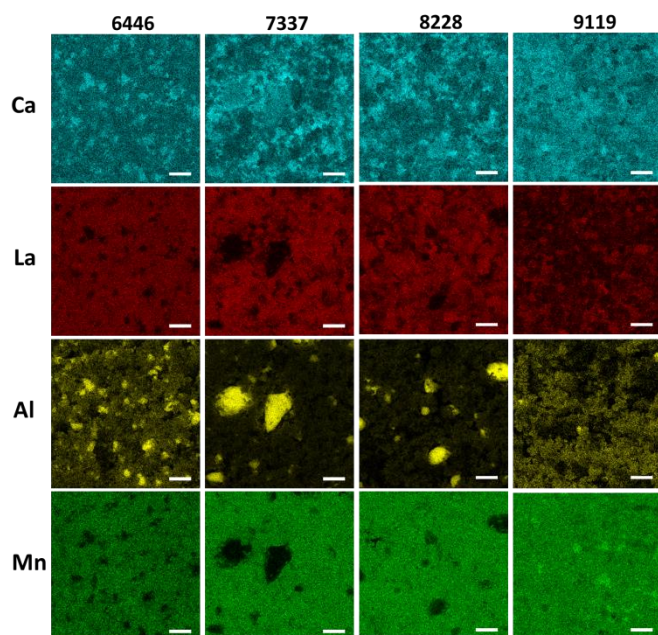

**SI 1.** Elemental maps from SEM-EDS analysis of  $\text{Ca}_x\text{La}_{1-x}\text{Al}_{1-x}\text{Mn}_x\text{O}_{3-\delta}$  perovskite synthesized via solid state reaction, showing changes primarily in Al distribution between the four different compositions. Scale bars: 5  $\mu\text{m}$ .

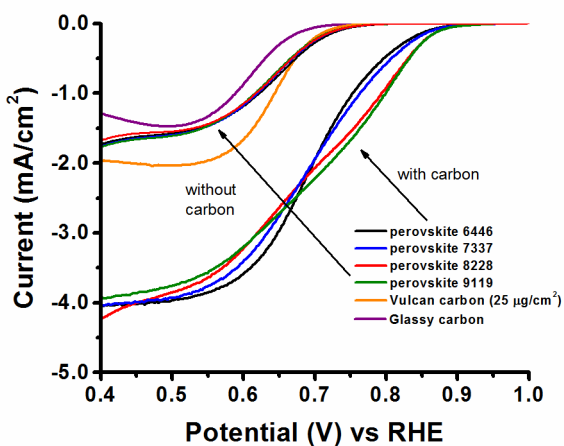

**SI 2.** ORR polarization curves of perovskite oxides synthesized through solid state reaction. When measuring perovskite oxides without the addition of carbon, ORR activity falls between that of the bare glassy carbon electrode and pure Vulcan carbon. After the addition of Vulcan carbon, ORR activity is greatly enhanced. (Note: perovskite oxide loadings in this study were 250  $\mu\text{g}/\text{cm}^2$ ;  $\sim 10\times$  higher than those reported in the main article).
